# Supplementary material
Source: PubMed Central journal article supplement (PMC1780223)
Supplement: amjpathol_169_5_1843__1.pdf [file amjpathol_169_5_1843__1.pdf]

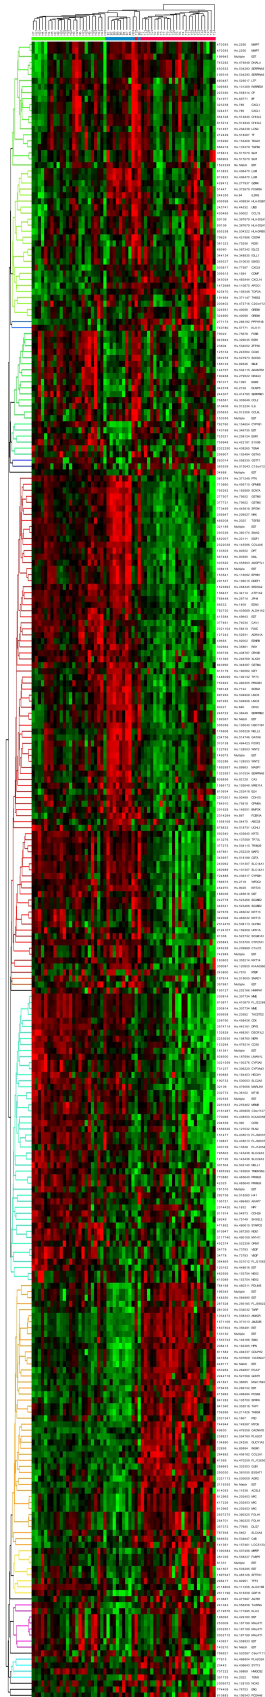

Supplemental Figure 1: Fully annotated heatmap supplementing Fig. 1a by including the identities (IMAGE Clone ID, Unigene ID, Gene Name) of all 275 genes.

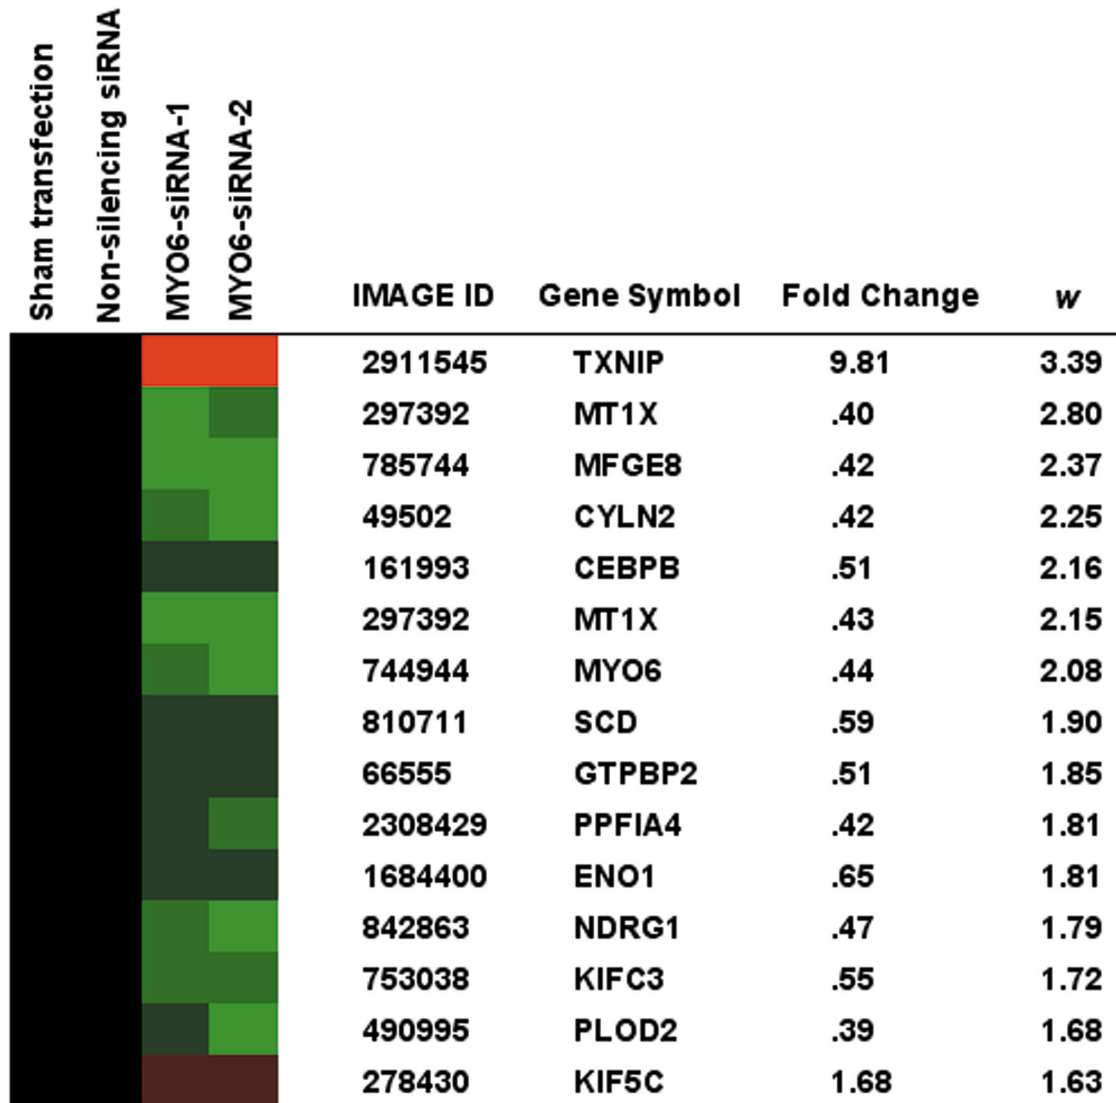

Supplemental Figure 2: Gene expression alterations following myosin VI inhibition. Each color-coded square reflects the expression ratio of each gene in each of the samples, with red indicating increased expression compared to reference (untreated LNCaP), and green meaning decreased expression compared to reference. Based on a comparison of 2 siRNA treated samples vs. 2 control samples, values of w were computed as described (15) and the top 15 genes were identified using a cut-off value of  $w > 1.6$ . Fold expression change is the ratio of the mean expression values, with siRNA treated samples as the numerator.
